# Supplementary material
Source: PubMed Central journal article supplement (PMC5576985)

# Supplementary Figure 1A

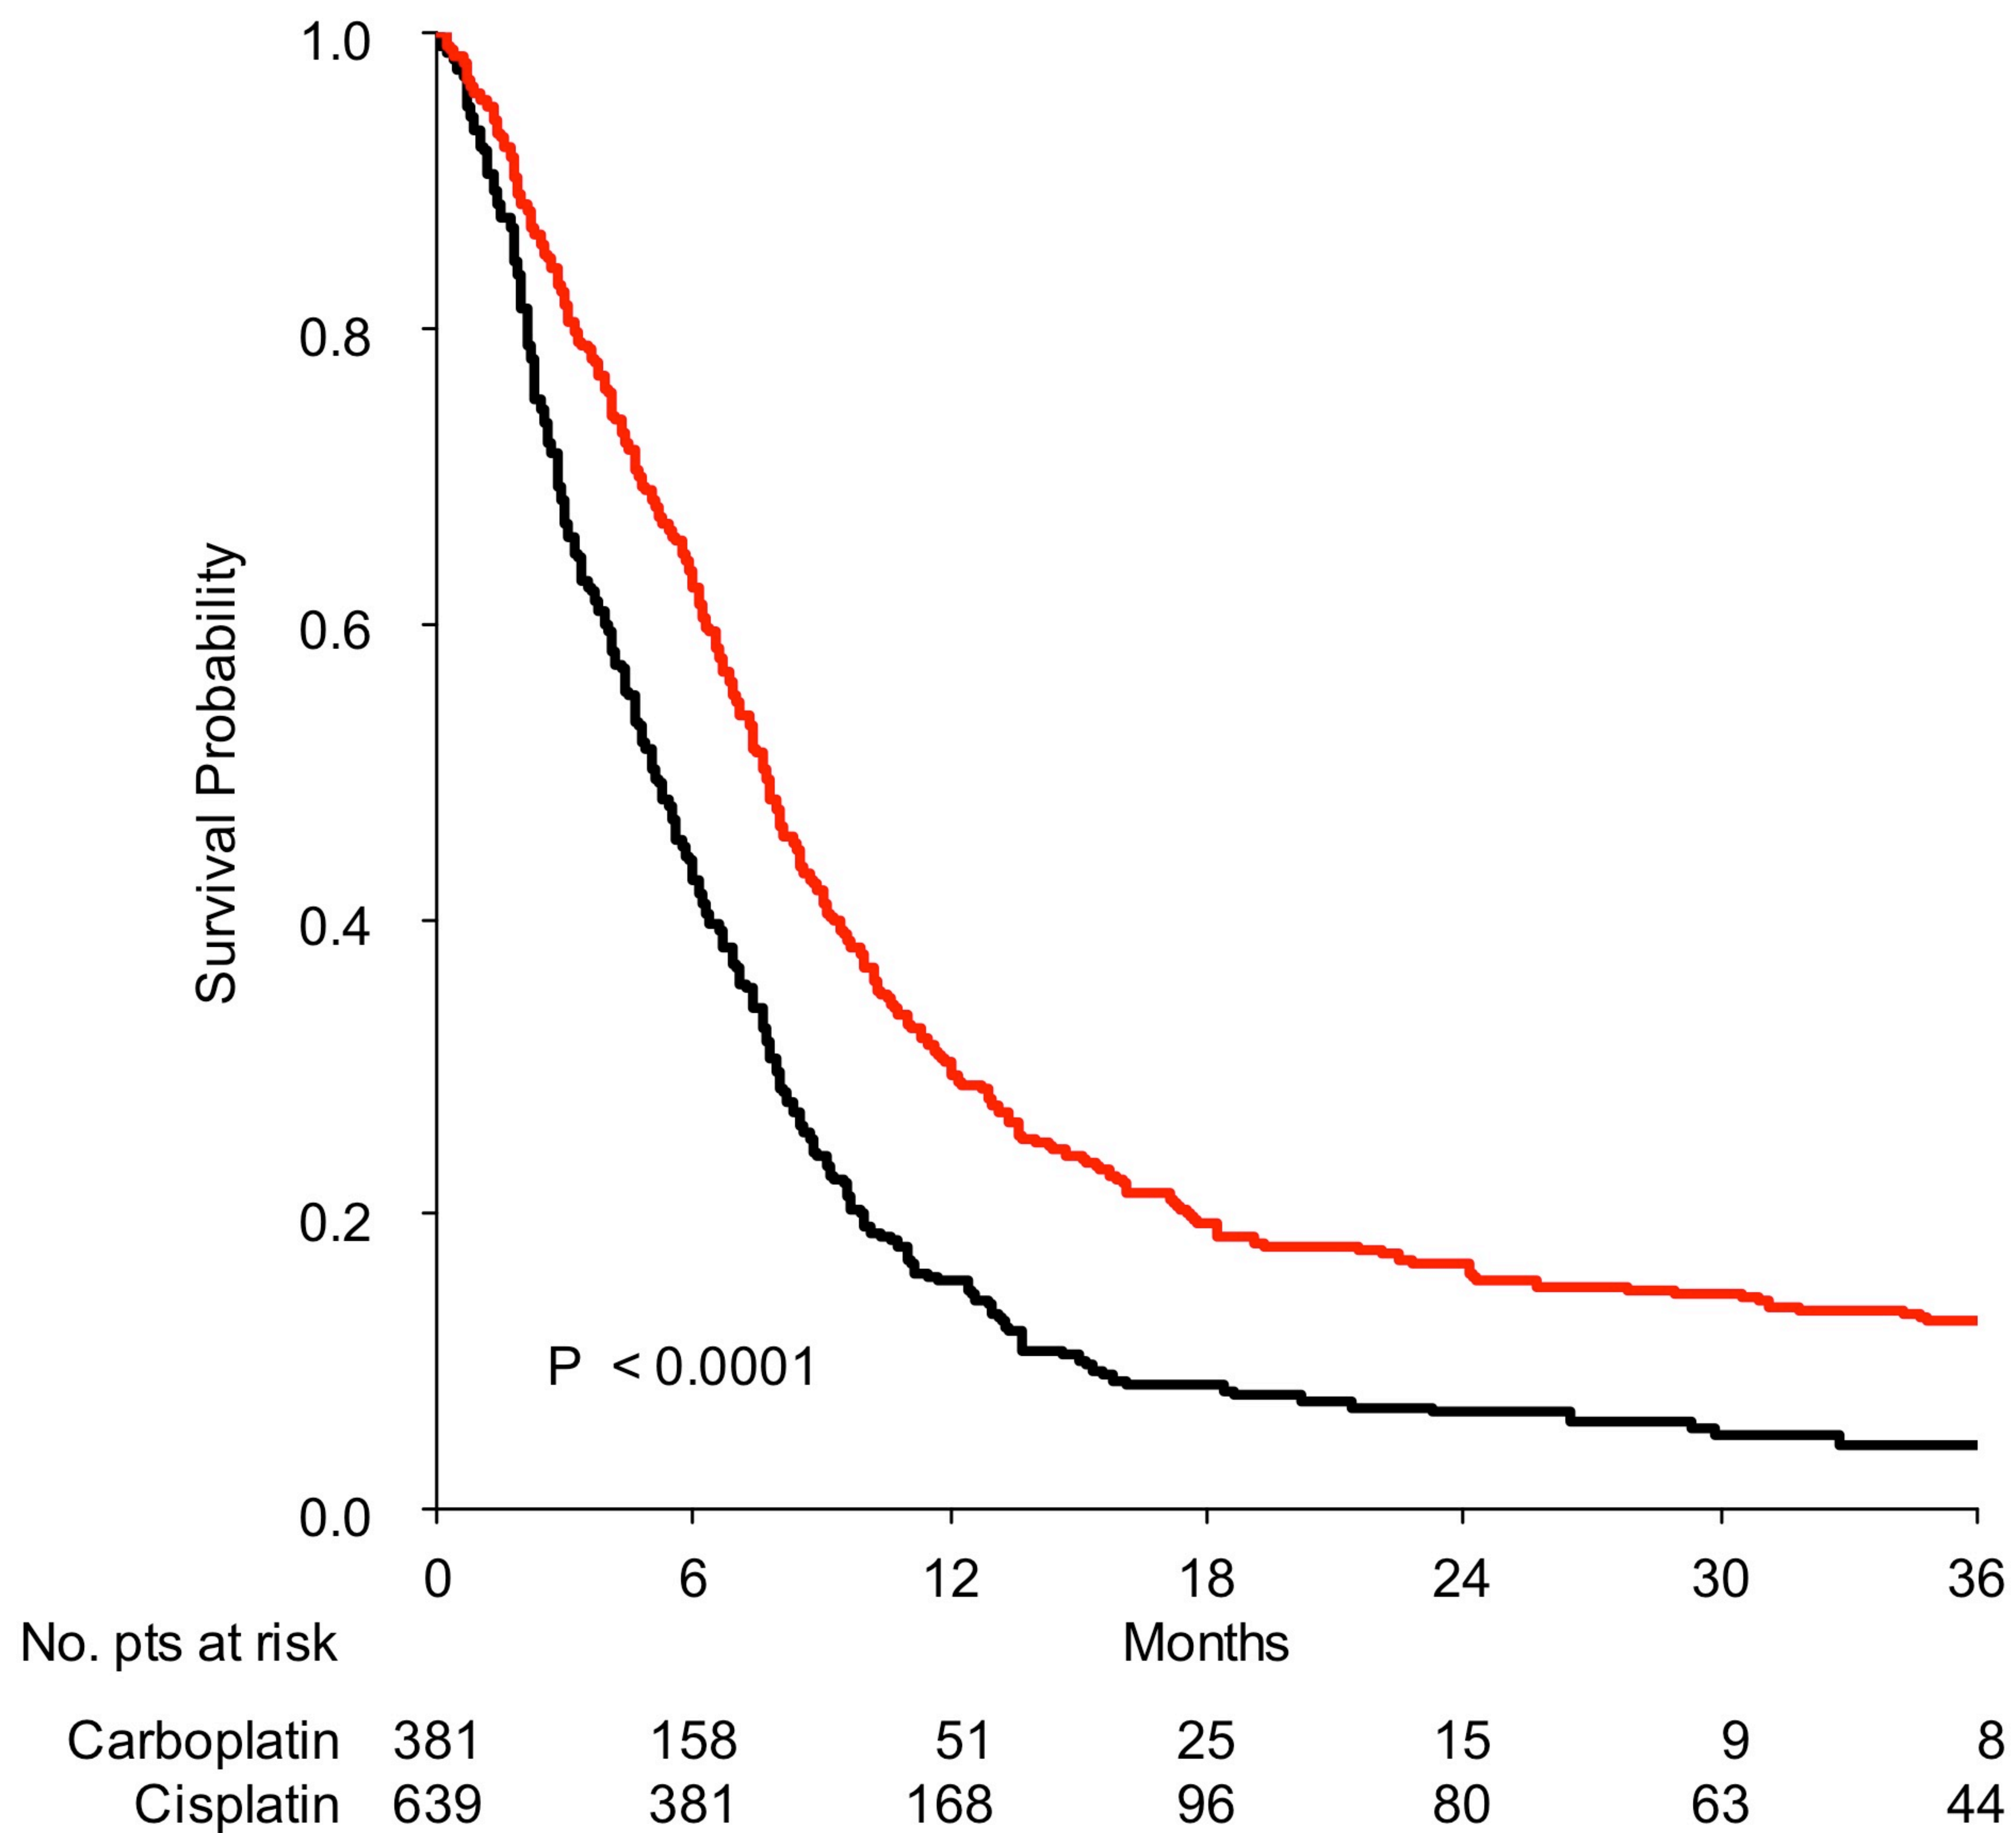

# Supplementary Figure 1B

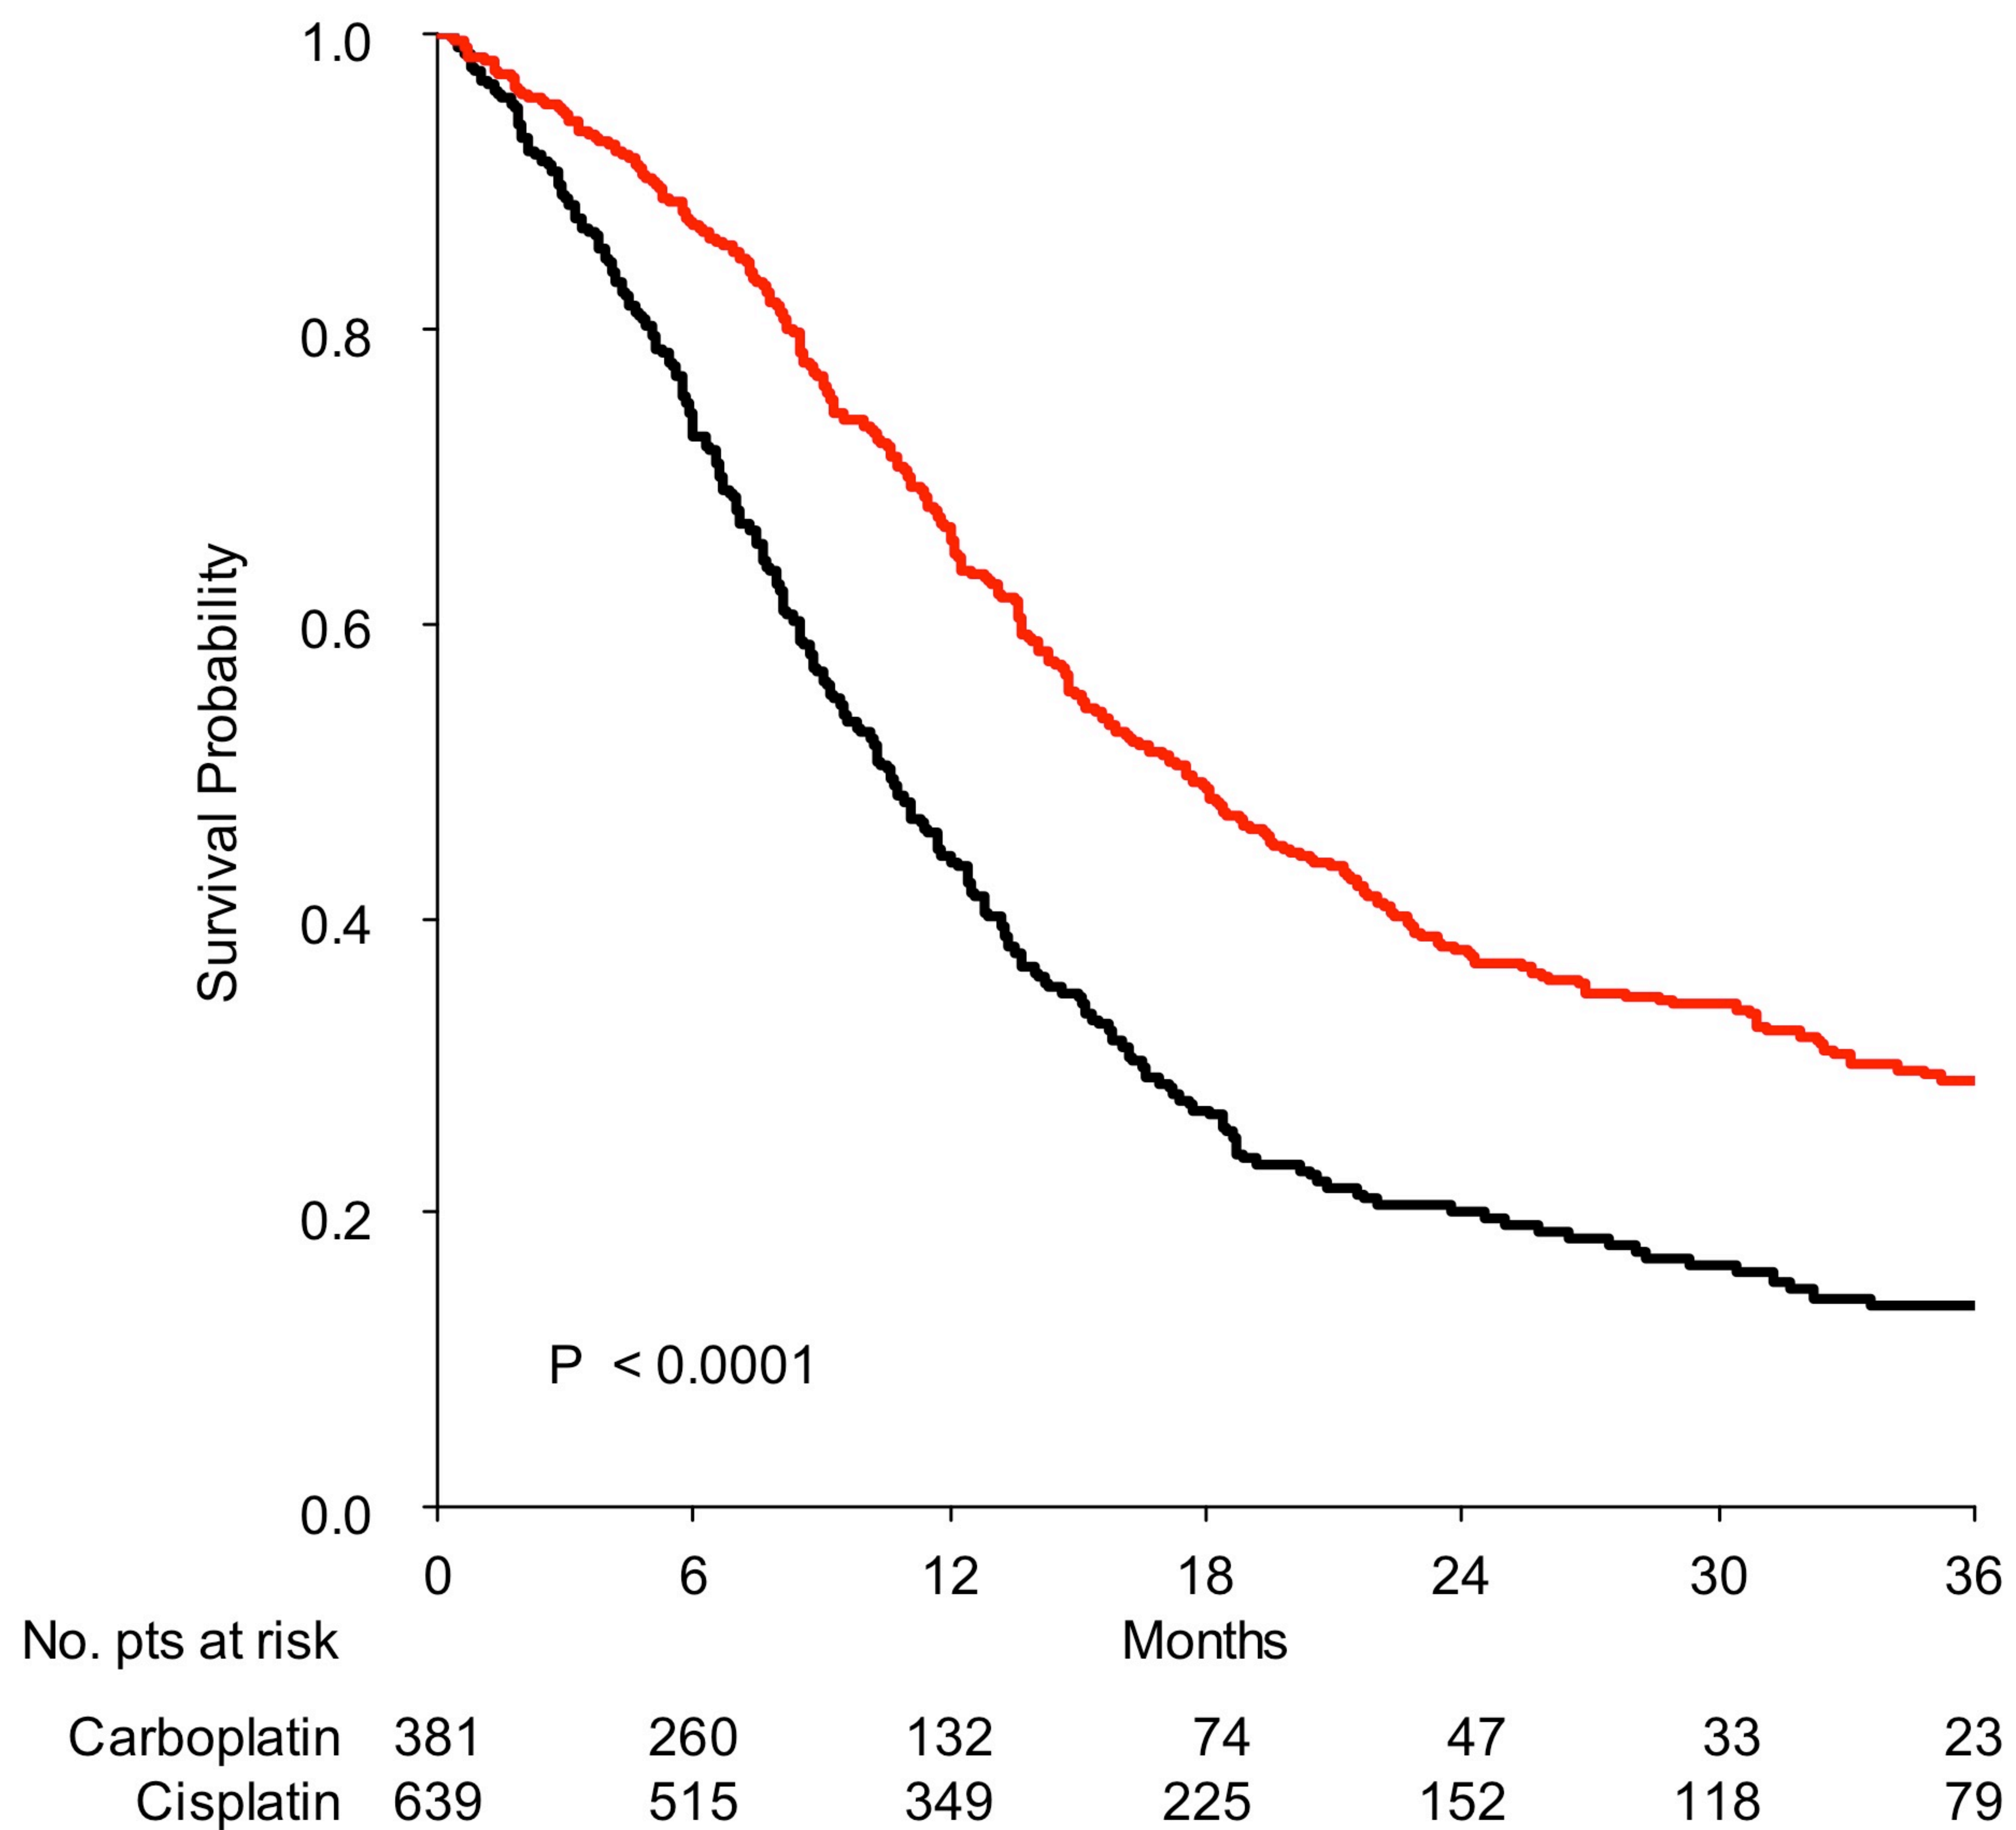



# Supplementary Figure 2A

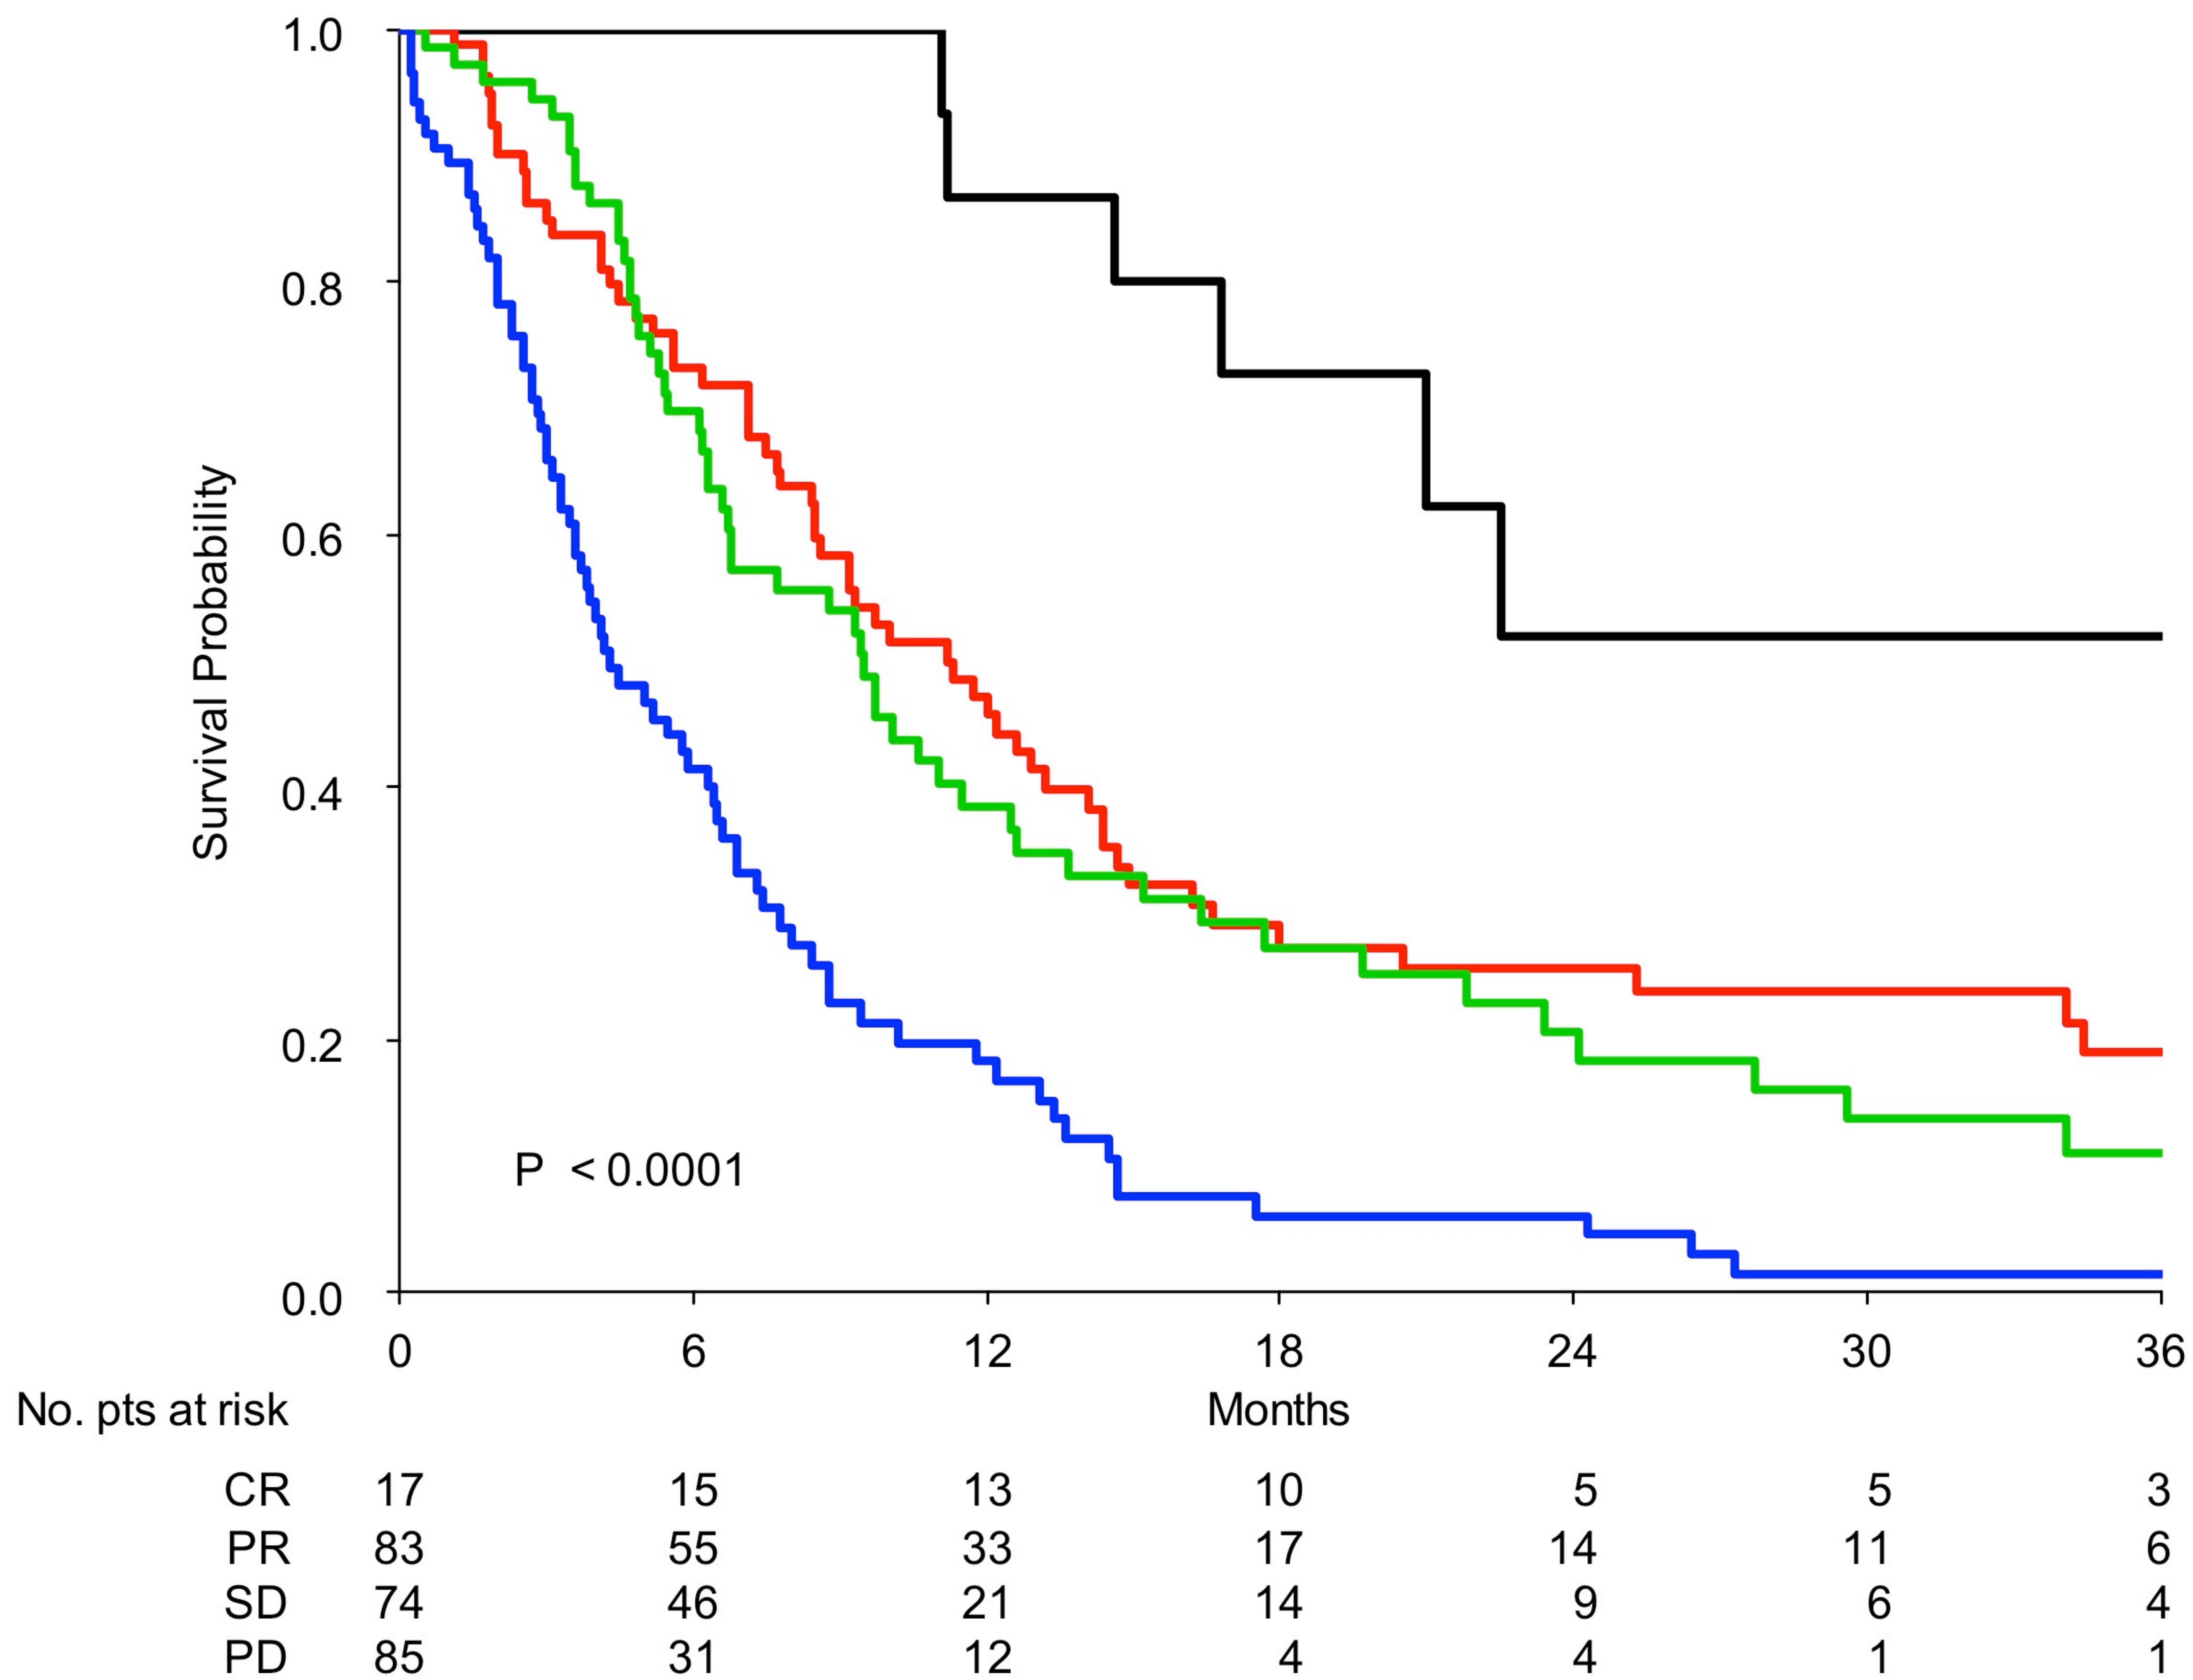

# Supplementary Figure 2B

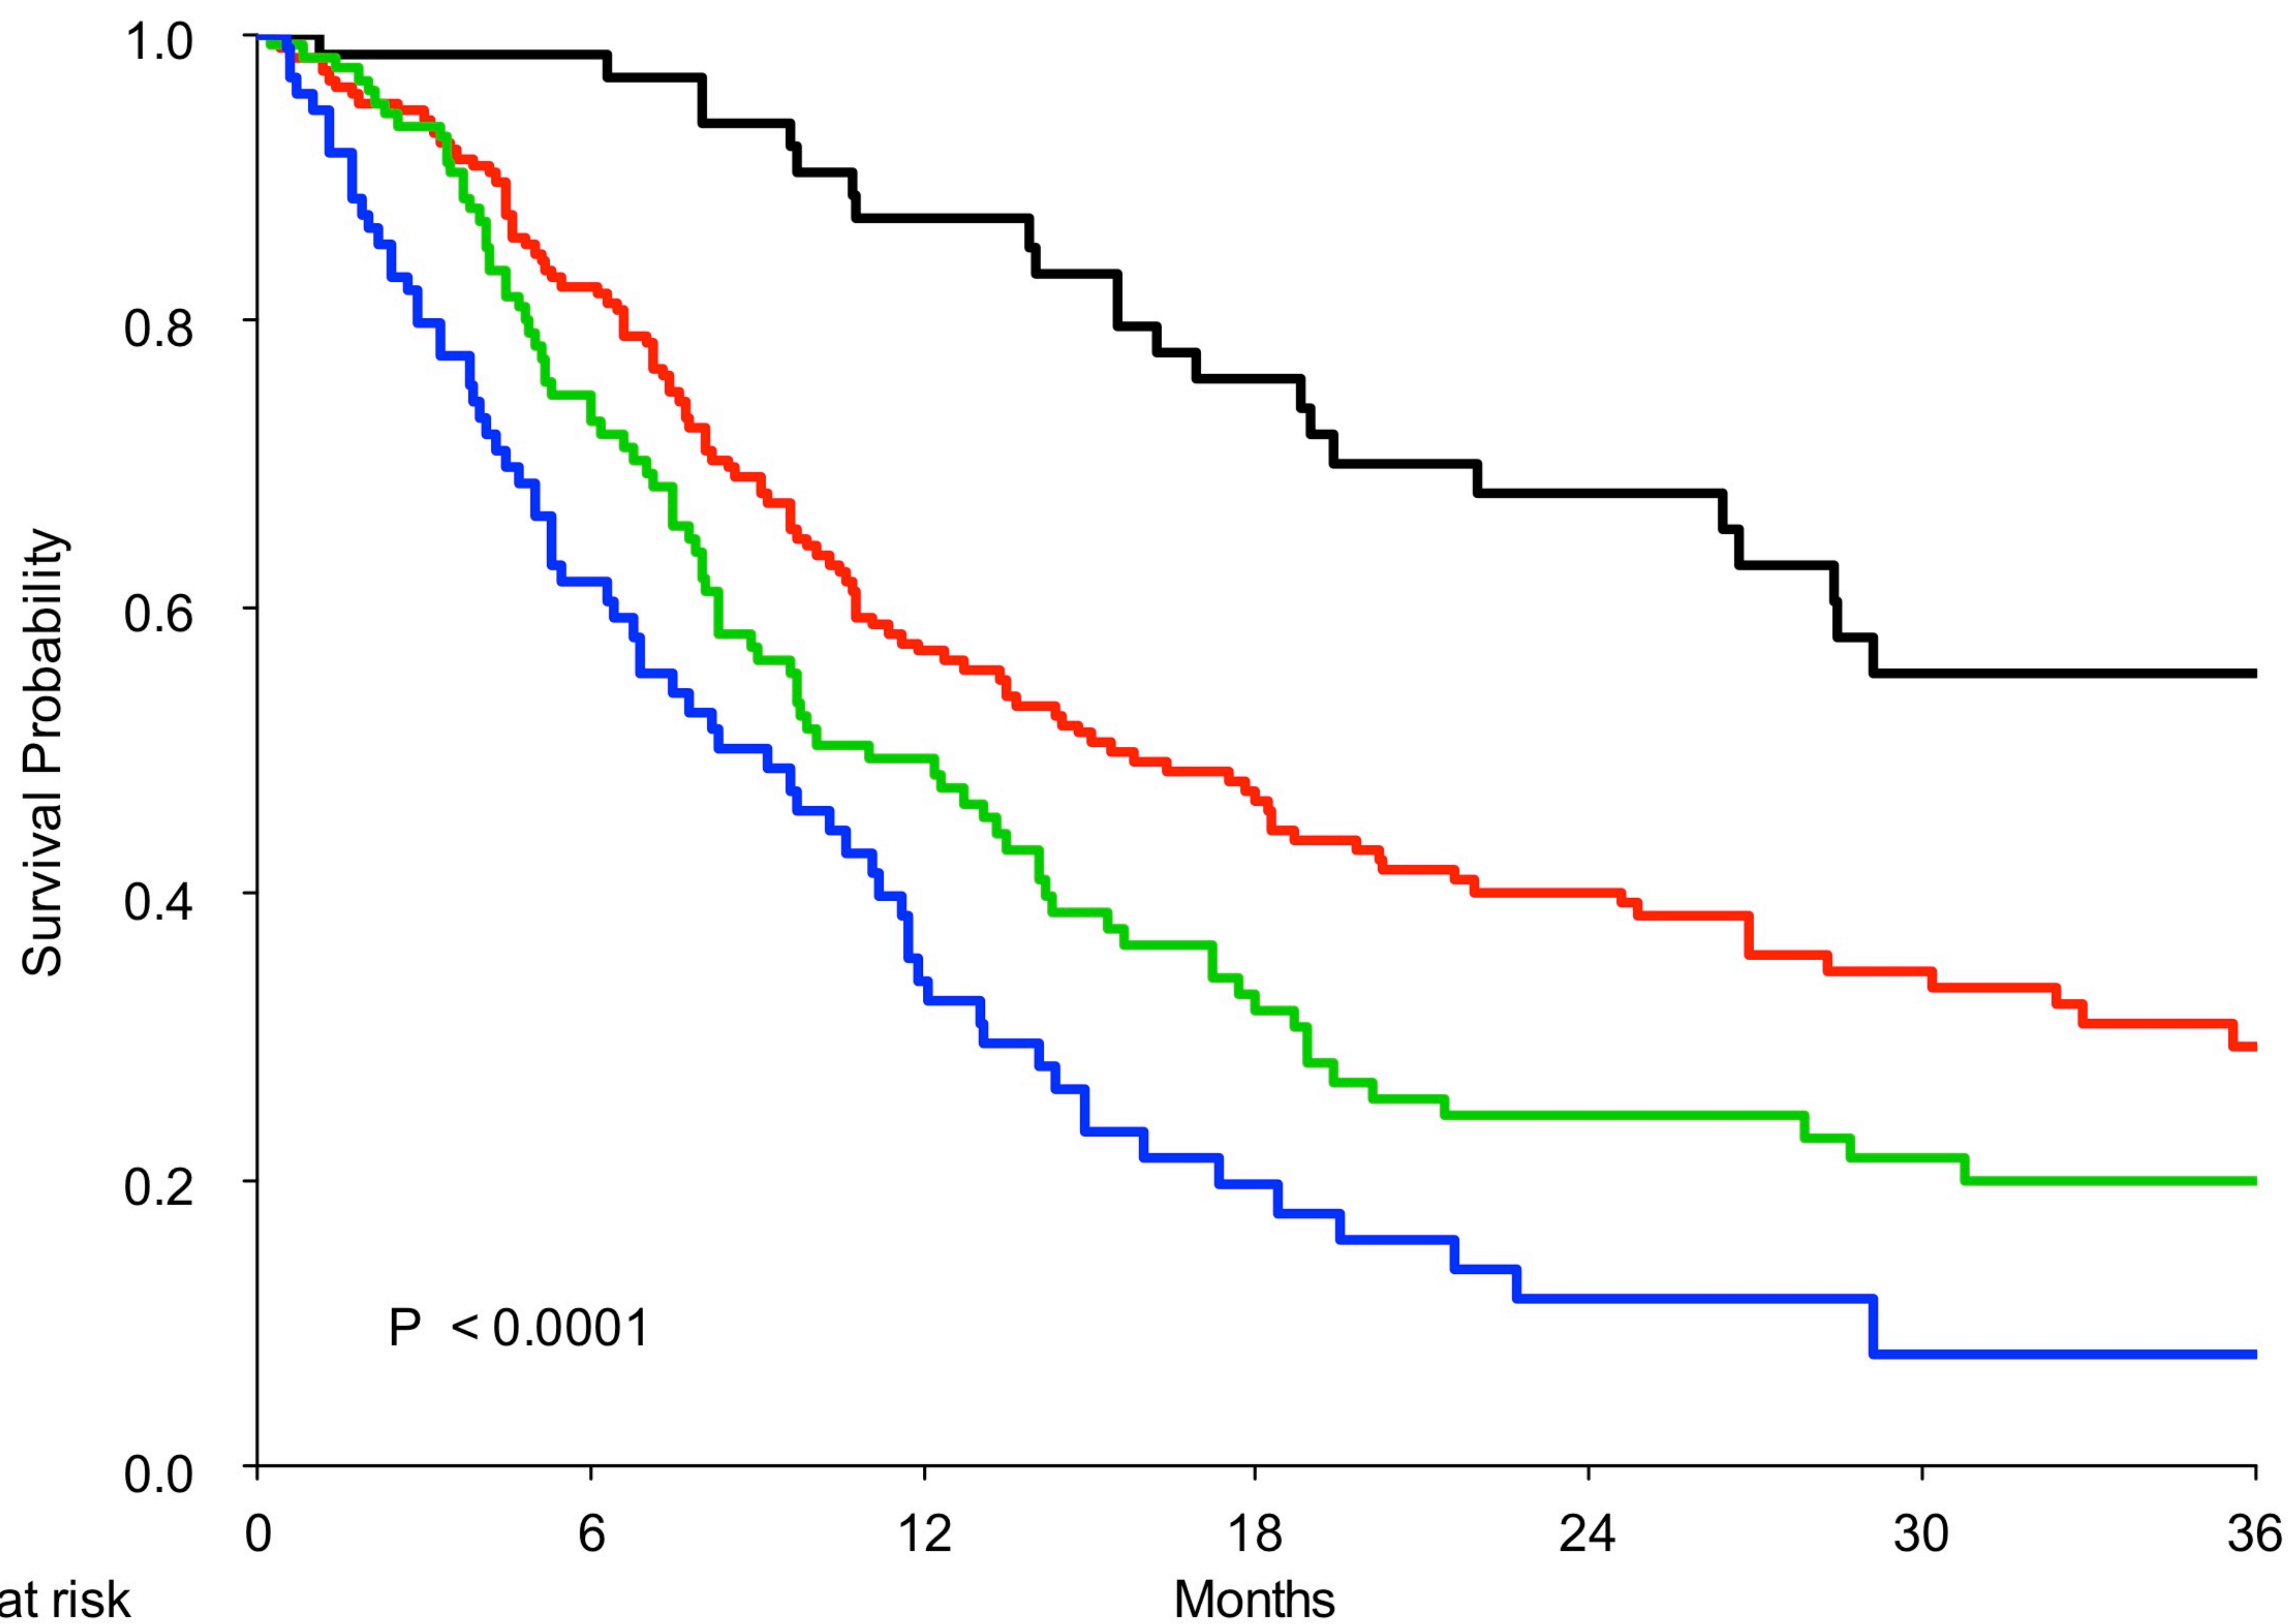

No. pts at risk

|    |     |     |    |    |    |    |    |
|----|-----|-----|----|----|----|----|----|
| CR | 68  | 64  | 51 | 40 | 31 | 22 | 13 |
| PR | 187 | 144 | 91 | 70 | 50 | 32 | 19 |
| SD | 127 | 84  | 48 | 27 | 18 | 15 | 11 |
| PD | 96  | 50  | 23 | 10 | 5  | 2  | 2  |



# Supplementary Figure 3A

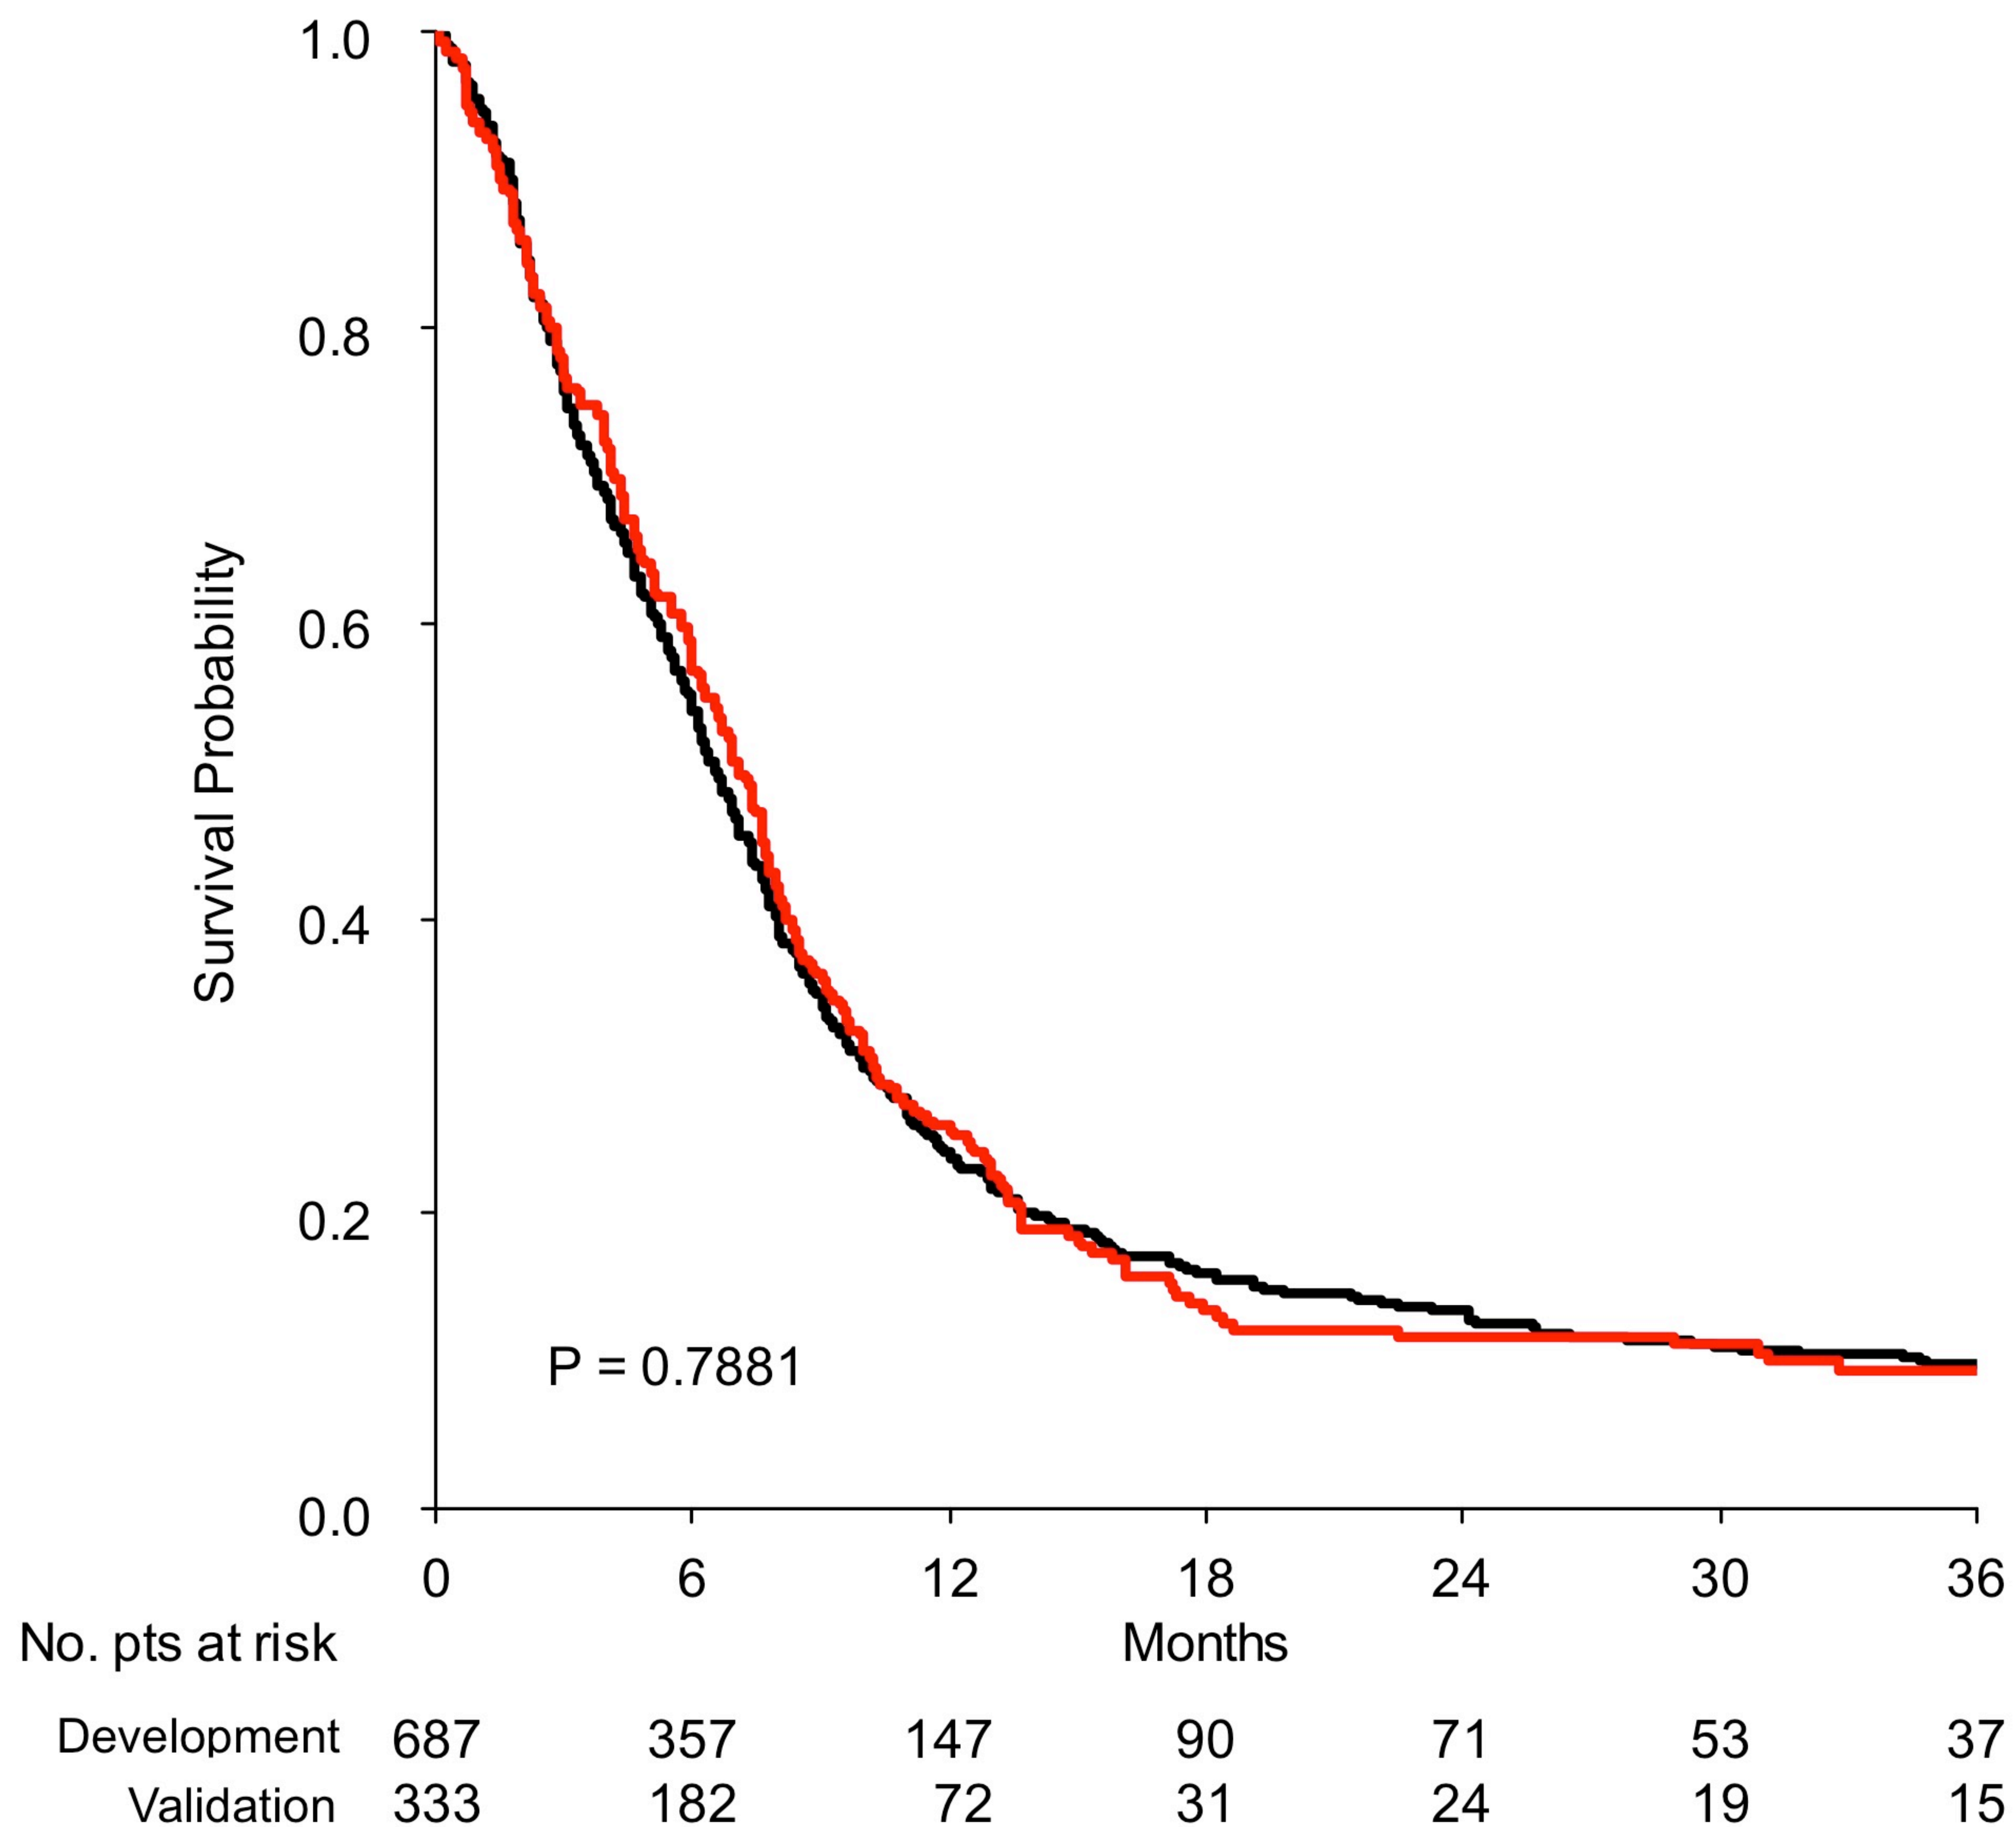

# Supplementary Figure 3B

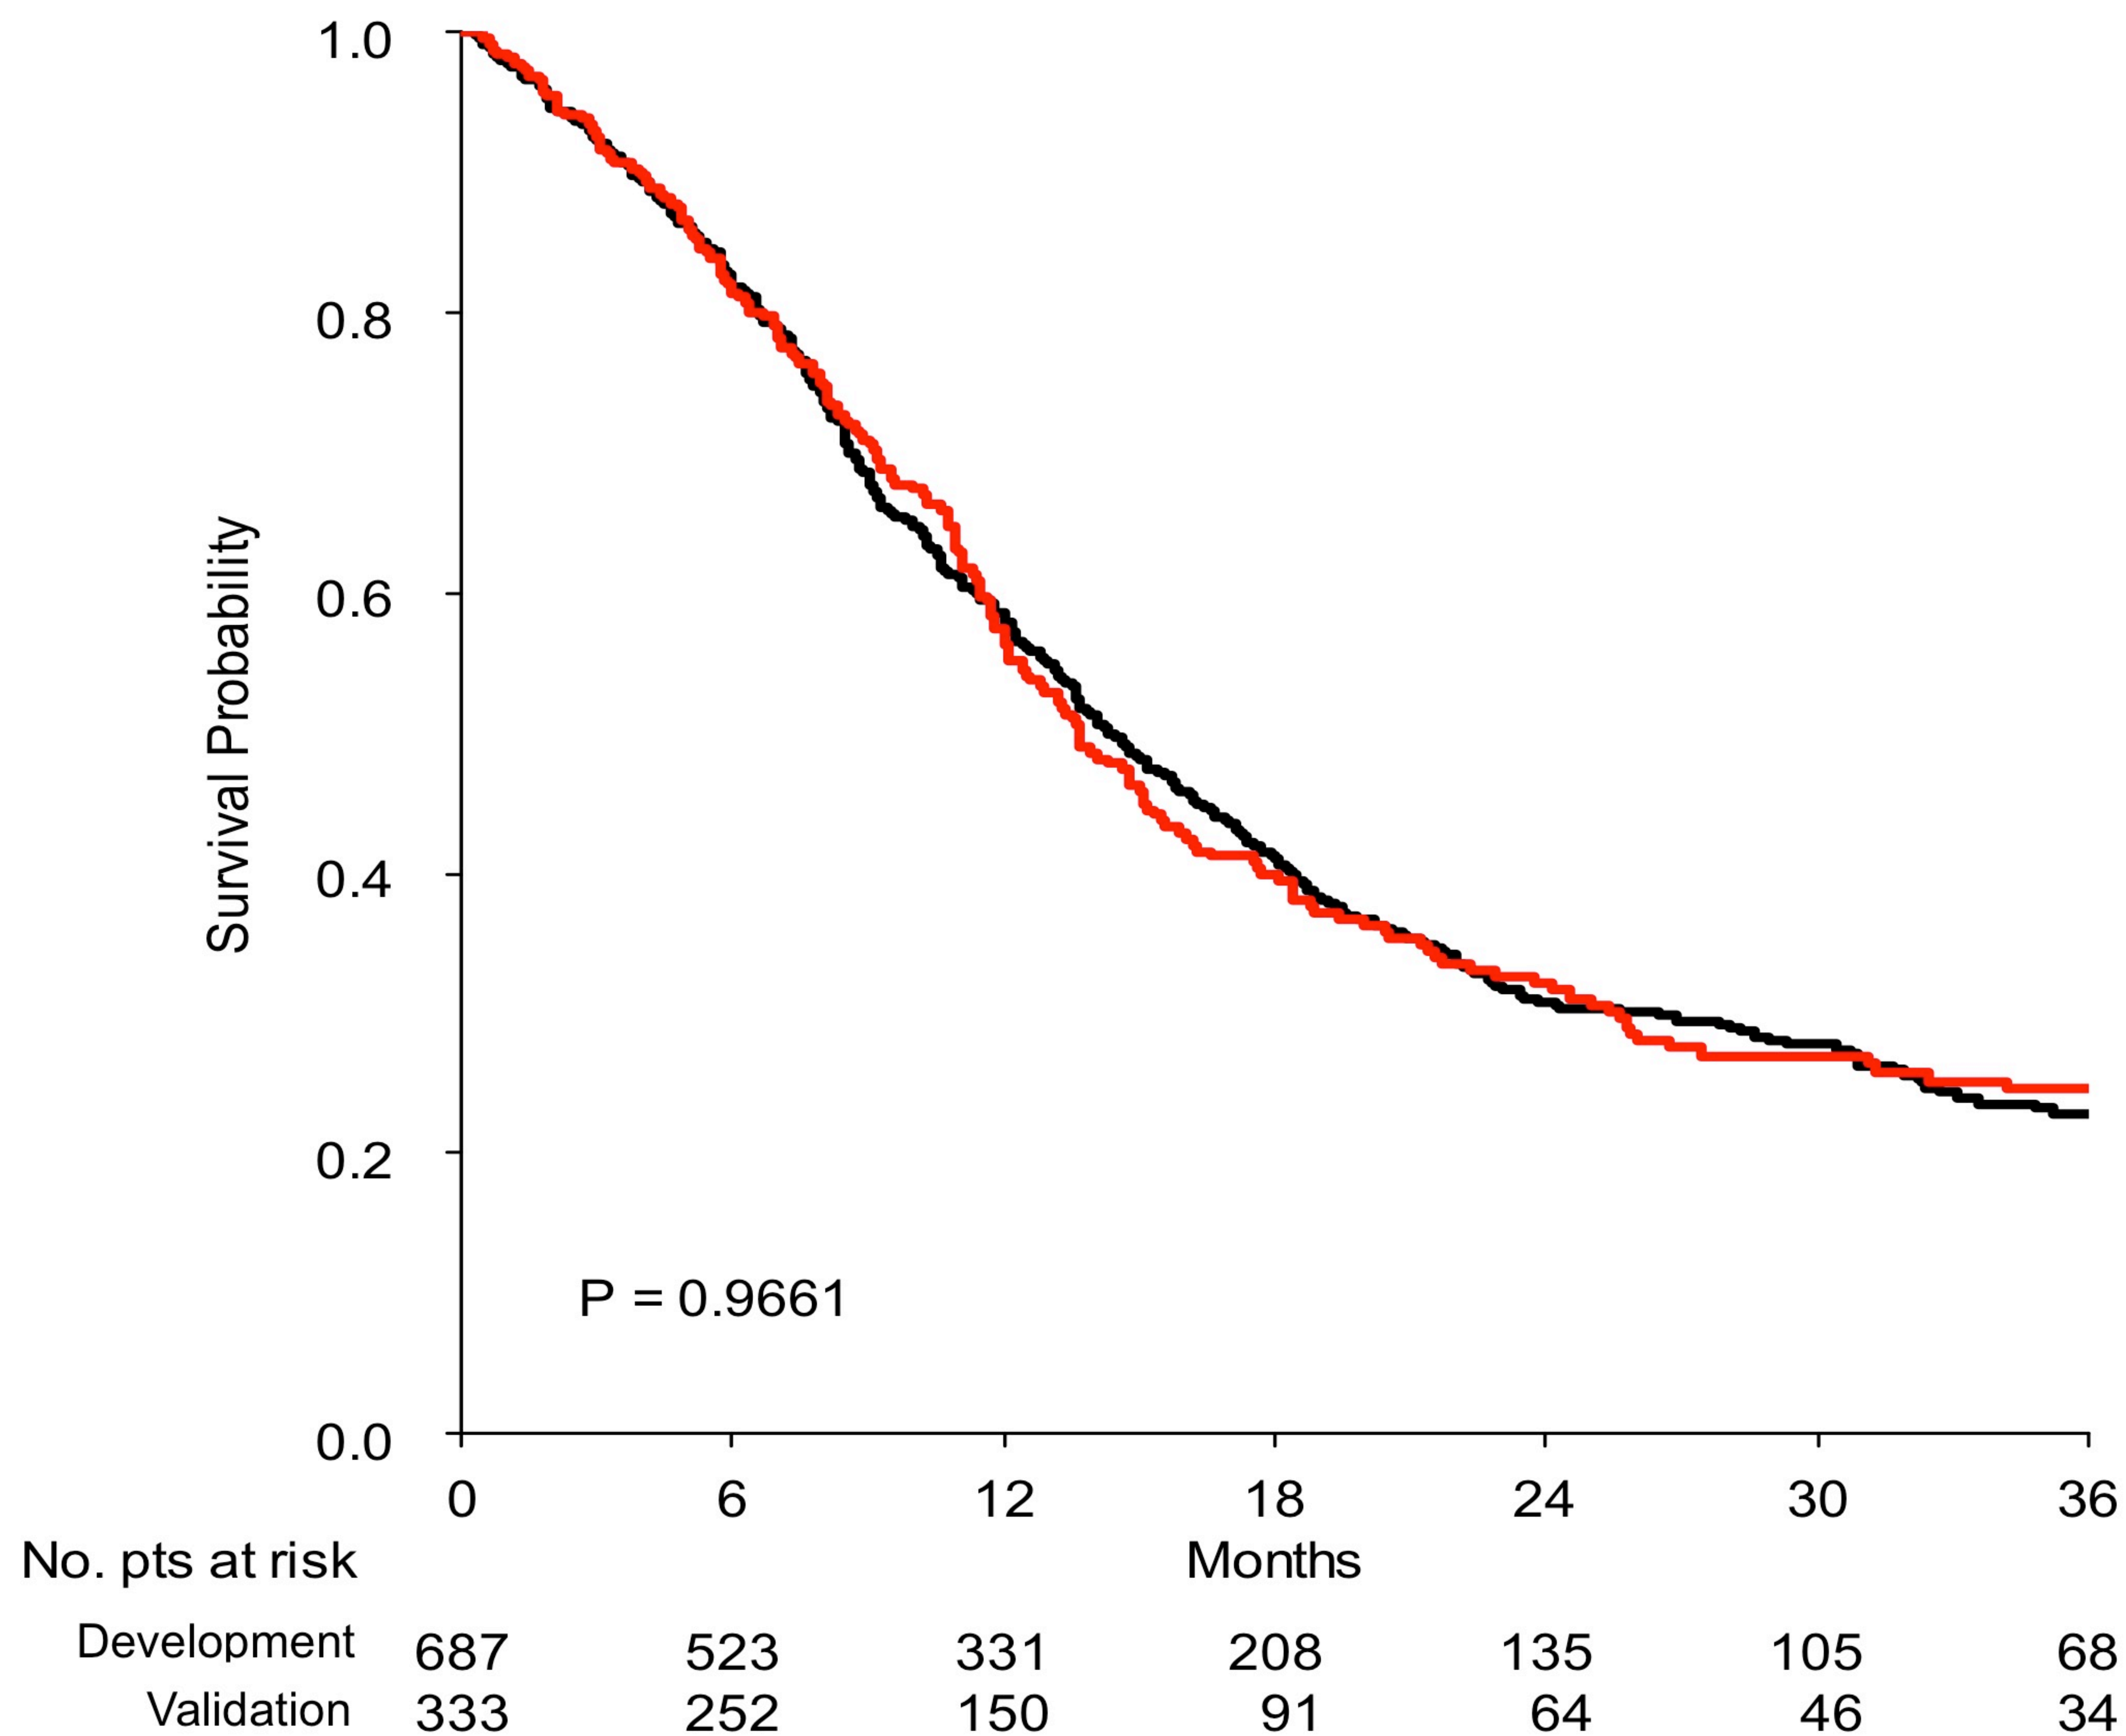

# Supplementary Figure 4

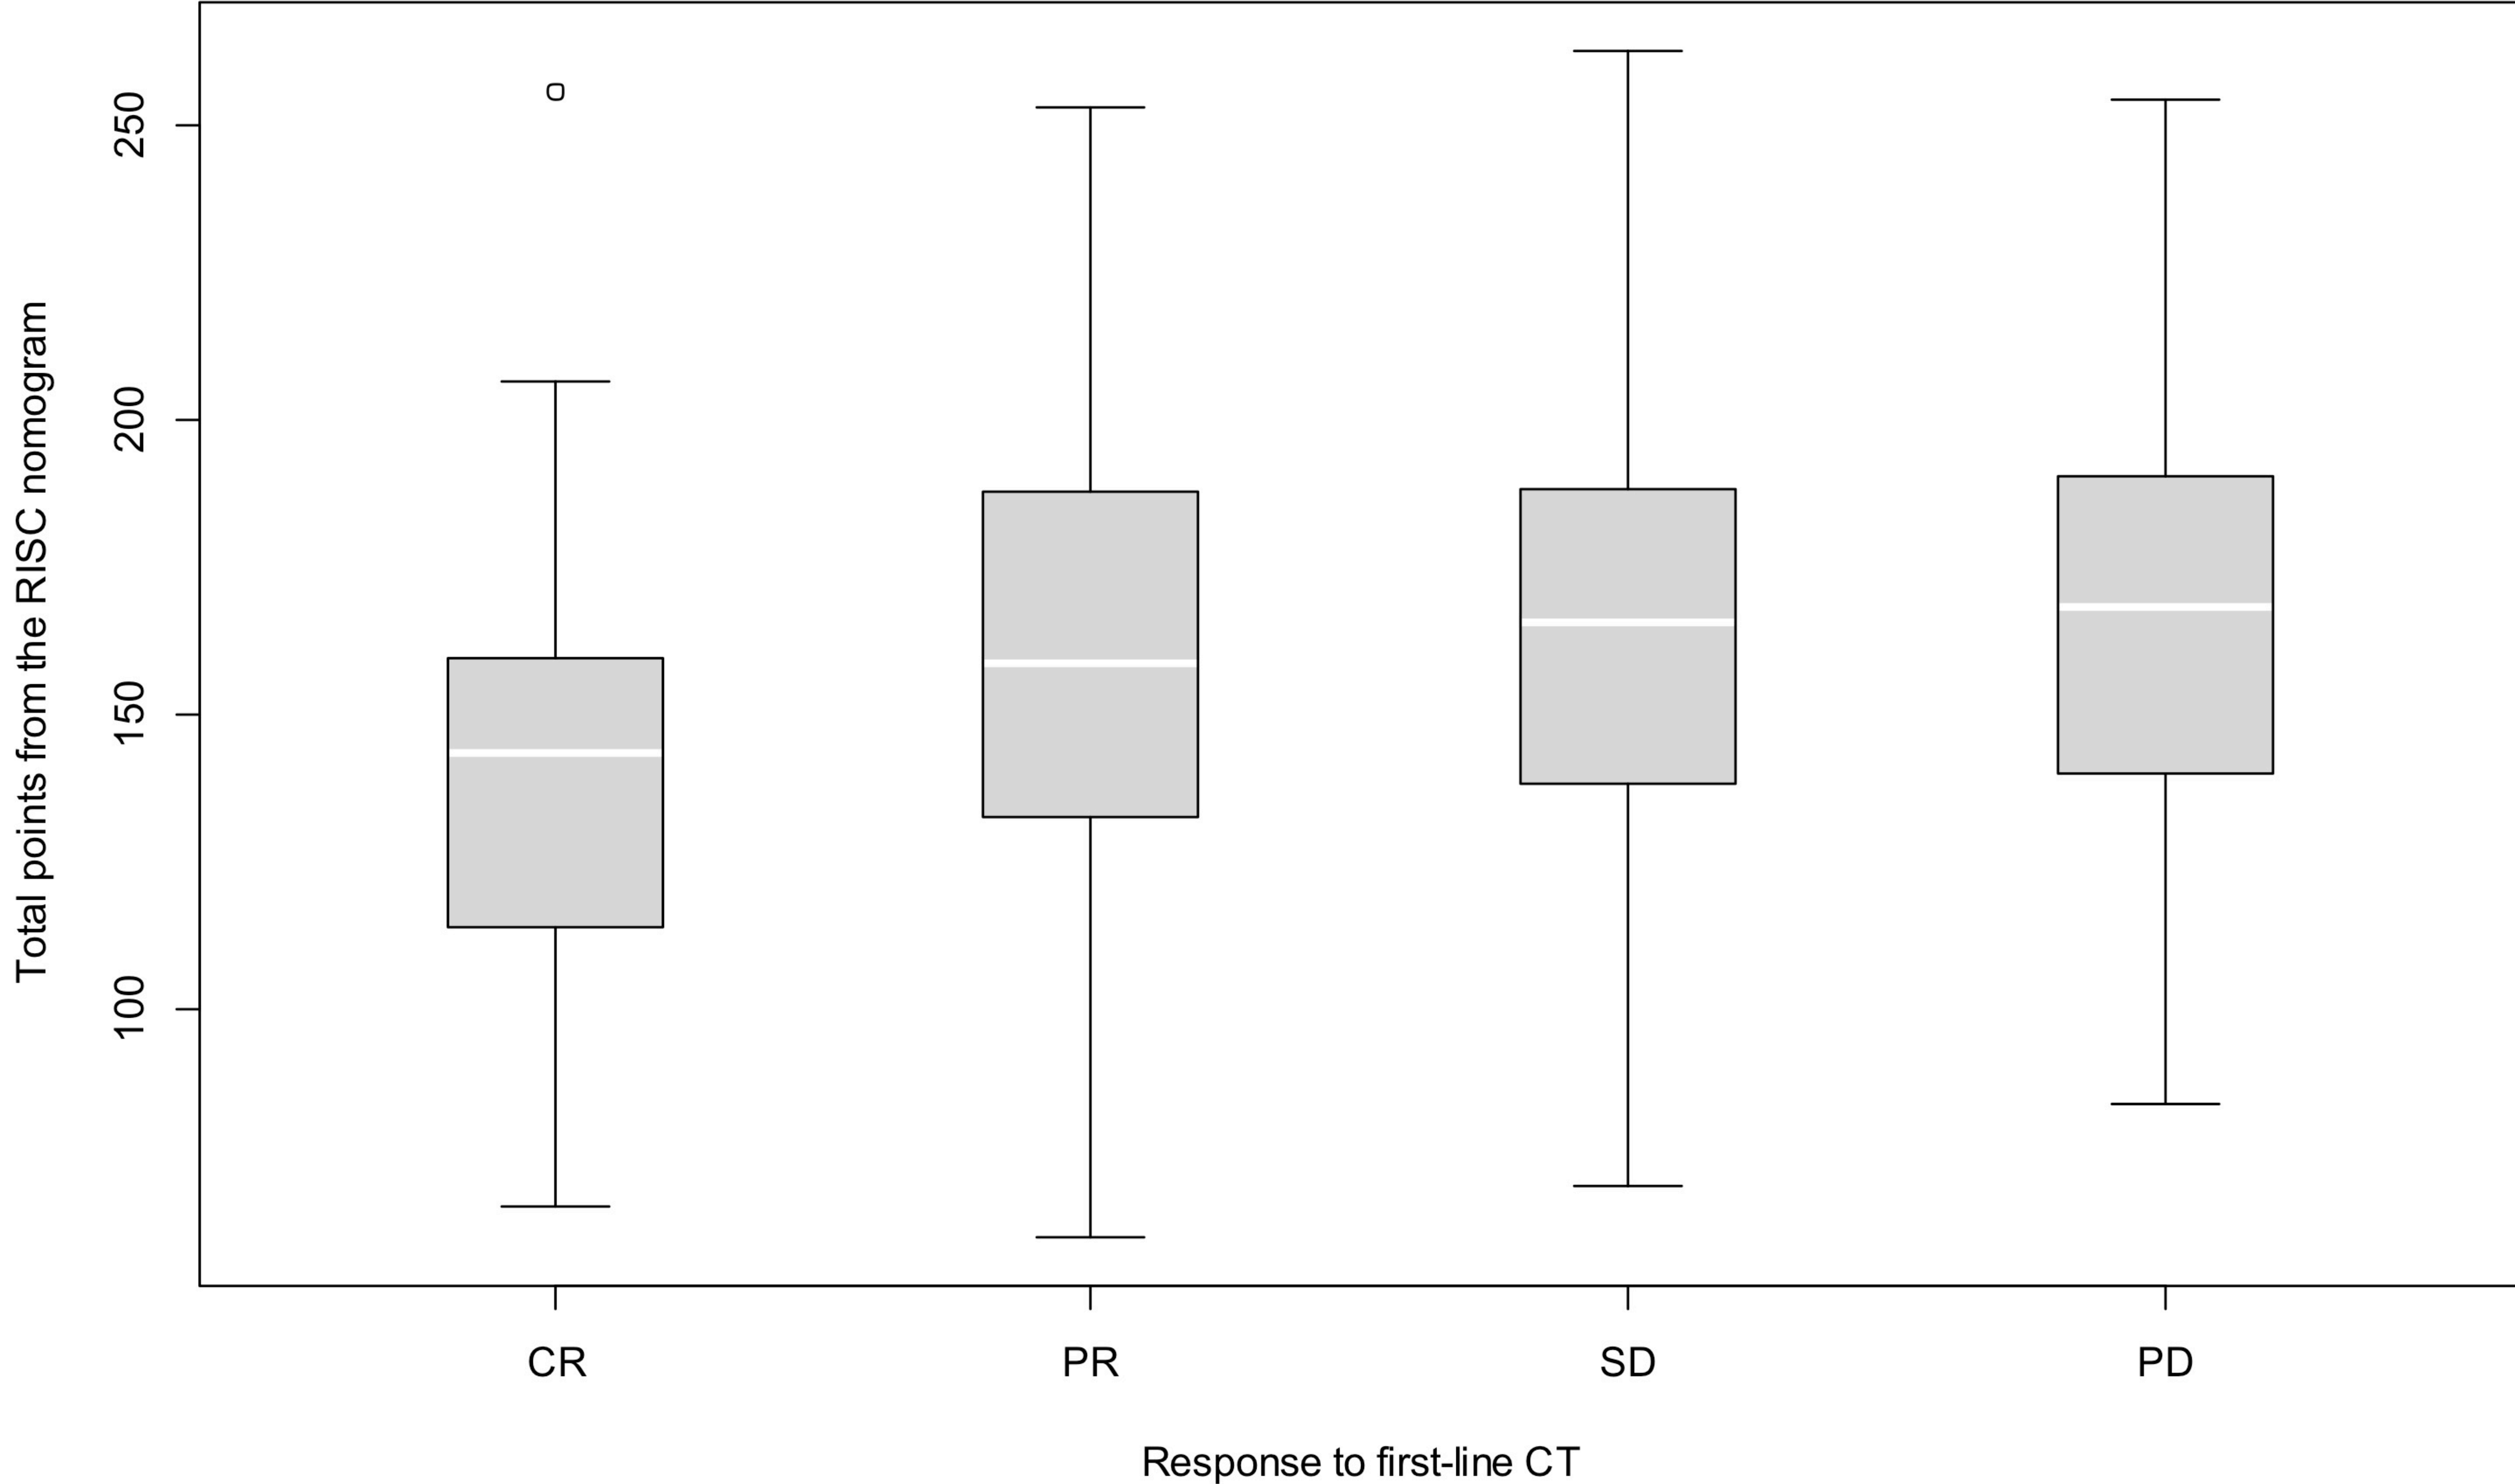

Supplement: NIHMS896015-supplement-Supplementary_Figures.pdf [file NIHMS896015-supplement-Supplementary_Figures.pdf]
